# Supplementary material for: Imaging mRNA expression levels in living cells with PNA·DNA binary FRET probes delivered by cationic shell-crosslinked nanoparticles
Source: Royal Society of Chemistry journal article supplement (doi:10.1039/c3ob26923j), 2013-01-01
Supplement: c3ob26923j.pdf [file c3ob26923j.pdf]

## Supplementary information

### Imaging mRNA expression levels in living cells with PNA•DNA binary FRET probes delivered by cationic shell-crosslinked nanoparticles

Zhenghui Wang<sup>a</sup>, Ke Zhang<sup>a,d</sup>, Yuefei Shen,<sup>a</sup> Jillian Smith,<sup>a</sup> Sharon Bloch<sup>c</sup>, Samuel Achilefu<sup>c</sup>, Karen L. Wooley<sup>a,b</sup>, John-Stephen Taylor<sup>a\*</sup>

<sup>a</sup>Department of Chemistry, Washington University, St. Louis, MO 63130

<sup>b</sup>Department of Chemistry, Texas A&M University, P.O. Box 30012, College Station, TX 77842-3012

<sup>c</sup>Department of Radiology, Optical Radiology Laboratory, Washington University School of Medicine, 4525 Scott Avenue, Saint Louis, MO 63108, USA.

| Contents                                                                                                | Pg |
|---------------------------------------------------------------------------------------------------------|----|
| Experimental Section. Dissociation constant of PNA261 for iNOS mRNA.                                    | 2  |
| <b>Table S1.</b> BLAST of PNA-Cy5                                                                       | 4  |
| <b>Table S2.</b> BLAST of FAM-PNA                                                                       | 4  |
| <b>Table S3.</b> BLAST of PNA-Cy5 + FAM-PNA                                                             | 5  |
| <b>Figure S1.</b> Antisense ODN-261 binding curves.                                                     | 6  |
| <b>Figure S2.</b> PNA-261 competition experiment.                                                       | 7  |
| <b>Figure S3.</b> The five lowest energy structures predicted for the iNOS mRNA sequence by MFOLD.      | 8  |
| <b>Figure S4.</b> Complete folded structure of the lowest energy -1326.30 kcal/mol iNOS mRNA structure. | 9  |
| <b>Figure S5.</b> Effect of cSCK binding on FRET between PNA-Cy5•DNA and FAM-PNA•DNA.                   | 10 |

## Experimental

**Dissociation constant of PNA-261 for iNOS mRNA.** This procedure follows the two step procedure described in *Bioconjugate Chemistry* 2012, 23, 574-585 involving the binding constant determination of an antisense ODN for the mRNA site in question (the actual site targeted by PNA-Cy5 is underlined), and then determining the binding constant of the PNA for the mRNA target site by a competition assay with the ODN.

### **Dissociation constant of ODN-261 for iNOS mRNA by a Dynabead-based binding assay.**

The radiolabeled ODN-261 d(GTTTTCTTCACGTTGTTGTTA) (100 pM) was incubated with biotinylated mRNA (0.01, 0.1, 1, 10, 100 nM) and 1  $\mu$ L of RNase inhibitor for 4 h at 37 °C in a total volume of 100  $\mu$ L. Streptavidin coated Dynabeads were added and mixed for 30 min and then separated by a magnet, washed twice and resuspended in 100  $\mu$ L of hybridization buffer (5 mM Tris-HCl, pH 7.0, 1 mM EDTA, 0.1 M NaCl). The bound and free solutions were then assayed by liquid scintillation counting. The dissociation constant was determined by non-linear fitting of the fraction bound versus RNA concentration to equation (1) using the Kaleidagraph program.

$$(1) F_B = NSB + \frac{SB * ([L] + K_d + [RNA]) - \sqrt{([L] + K_d + [RNA])^2 - 4 * [RNA]}}{2 * [L]}$$

where FB is the fraction of bound ODN, NSB is the nonspecifically bound fraction, SB is the specifically bound fraction and was set equal to (1-NSB), [L] is total ODN concentration,  $K_d$  is dissociation constant of the ODN and [RNA] is total RNA concentration. The dissociation constants from three separate experiments were then averaged (Figure S1).

### Dissociation constant of PNA-261 for iNOS mRNA by a competition assay.

Radiolabeled ODN (1000 pM) was incubated with biotinylated mRNA (10 pM) and 1  $\mu$ L of RNase inhibitor for 4 h at 37 °C, to which unlabeled competitor PNA-261 5'-GTTTTCTTCACGTTGTG-3' (0, 0.001, 0.01, 0.1, 1, 10 nM) was added. Streptavidin coated Dynabeads were then added and incubated for another 30 min at 37 °C. Following incubation, the reaction mixture was separated with a magnet, washed twice and resuspended in hybridization buffer (5 mM Tris-HCl, pH 7.0, 1 mM EDTA, 0.1 M NaCl). The solutions containing bound and free ODN were counted by liquid scintillation. The fraction of bound ODN (B) was then plotted against the PNA concentration ([PNA]), and the  $IC_{50}$  value was obtained by fitting the data to equation (2). The  $K_d$  for the PNA was then obtained using equation (3). The dissociation constants from three separate competition experiments were then averaged (Figure S2).

$$(2) B = B_{min} + \frac{B_{max} - B_{min}}{1 + 10^{\log[PNA] - \log(IC_{50})}}$$

$$(3) K_d(PNA) = \frac{IC_{50}}{1 + \frac{[ODN]}{K_d(ODN)}}$$

**Table S1.** BLAST of PNA-Cy5

| mRNA                                                                                                      | alignment |      |                        |       |
|-----------------------------------------------------------------------------------------------------------|-----------|------|------------------------|-------|
| Mus musculus nitric oxide synthase 2, inducible (Nos2), mRNA                                              | Query     | 1    | TCTTCACGTTGTTGT 15<br> | 15/15 |
|                                                                                                           | Sbjct     | 271  | TCTTCACGTTGTTGT 257    |       |
| Mus musculus G protein-coupled receptor 107 (Gpr107), mRNA                                                | Query     | 2    | CTTCACGTTGTTG 14<br>   | 14/15 |
|                                                                                                           | Sbjct     | 739  | CTTCACGTTGTTG 727      |       |
| Mus musculus phosphoinositide-3-kinase, catalytic, gamma polypeptide (Pik3cg), transcript variant 2, mRNA | Query     | 1    | TCTTCACGTTGTT 13<br>   | 13/15 |
|                                                                                                           | Sbjct     | 6664 | TCTTCACGTTGTT 6652     |       |
| Mus musculus glucan (1,4-alpha-), branching enzyme 1 (Gbel), mRNA                                         | Query     | 3    | TTCACGTTGTTGT 15<br>   | 13/15 |
|                                                                                                           | Sbjct     | 581  | TTCACGTTGTTGT 569      |       |

**Table S2.** Blast of FAM-PNA

|                                                                                                                        |       |       |                        |       |
|------------------------------------------------------------------------------------------------------------------------|-------|-------|------------------------|-------|
| Mus musculus nitric oxide synthase 2, inducible (Nos2), mRNA                                                           | Query | 1     | ATGTCCTTTTCCTCT 15<br> | 15/15 |
|                                                                                                                        | Sbjct | 254   | ATGTCCTTTTCCTCT 240    |       |
| Mus musculus dynein, axonemal, heavy chain 10 (Dnahc10), mRNA                                                          | Query | 2     | TGTCCTTTTCCTCT 15<br>  | 14/15 |
|                                                                                                                        | Sbjct | 9119  | TGTCCTTTTCCTCT 9106    |       |
| Mus musculus cDNA sequence BC005561 (BC005561), mRNA                                                                   | Query | 19    | TGTCCTTTTCCTCT 32<br>  | 14/15 |
|                                                                                                                        | Sbjct | 4837  | TGTCCTTTTCCTCT 4824    |       |
| Mus musculus pleckstrin homology domain containing, family A member 6 (Plekha6), transcript variant 2, mRNA            | Query | 1     | ATGTCCTTTTCCT 13<br>   | 13/15 |
|                                                                                                                        | Sbjct | 5675  | ATGTCCTTTTCCT 5663     |       |
| Mus musculus SPARC related modular calcium binding 1 (Smoc1), transcript variant 1, mRNA                               | Query | 2     | TGTCCTTTTCCTC 14<br>   | 13/15 |
|                                                                                                                        | Sbjct | 2454  | TGTCCTTTTCCTC 2442     |       |
| Mus musculus sperm antigen with calponin homology and coiled-coil domains 1-like (Specc1l), transcript variant 1, mRNA | Query | 2     | TGTCCTTTTCCTC 14<br>   | 13/15 |
|                                                                                                                        | Sbjct | 2457  | TGTCCTTTTCCTC 2445     |       |
| Mus musculus lysine (K)-specific demethylase 5C (Kdm5c), mRNA                                                          | Query | 2     | TGTCCTTTTCCTC 14<br>   | 13/15 |
|                                                                                                                        | Sbjct | 893   | TGTCCTTTTCCTC 881      |       |
| Mus musculus even skipped homeotic gene 1 homolog (Evxl), mRNA                                                         | Query | 2     | TGTCCTTTTCCTC 14<br>   | 13/15 |
|                                                                                                                        | Sbjct | 2711  | TGTCCTTTTCCTC 2699     |       |
| Mus musculus laminin, alpha 5 (Lama5), mRNA                                                                            | Query | 3     | GTCCTTTTCCTCT 15<br>   | 13/15 |
|                                                                                                                        | Sbjct | 11300 | GTCCTTTTCCTCT 11288    |       |
| Mus musculus nucleoporin 160 (Nup160), mRNA                                                                            | Query | 1     | ATGTCCTTTTCCT 13<br>   | 13/15 |
|                                                                                                                        | Sbjct | 4647  | ATGTCCTTTTCCT 4635     |       |
| Mus musculus sarcolemma associated protein (Slmap), mRNA                                                               | Query | 2     | TGTCCTTTTCCTC 14<br>   | 13/15 |
|                                                                                                                        | Sbjct | 1905  | TGTCCTTTTCCTC 1893     |       |

**Table S3.** Complete target site

|                                                              |       |     |                                  |     |  |
|--------------------------------------------------------------|-------|-----|----------------------------------|-----|--|
| Mus musculus nitric oxide synthase 2, inducible (Nos2), mRNA | Query | 1   | TCTTCACGTTGTTGTNNATGTCCTTTTCCTCT | 32  |  |
|                                                              |       |     |                                  |     |  |
|                                                              | Sbjct | 271 | TCTTCACGTTGTTGTTAATGTCCTTTTCCTCT | 240 |  |
| No mRNA matches > 15/30                                      |       |     |                                  |     |  |

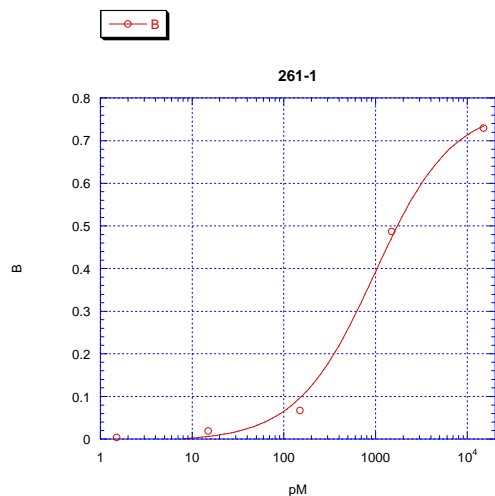

$$y = m1 + m2 * ((100 + m3 + m0) - \sqrt{...})$$

|       | Value      | Error    |
|-------|------------|----------|
| m1    | -0.0051874 | 0.016979 |
| m2    | 0.78539    | 0.033969 |
| m3    | 921.05     | 176.55   |
| Chisq | 0.0012996  | NA       |
| R     | 0.9985     | NA       |

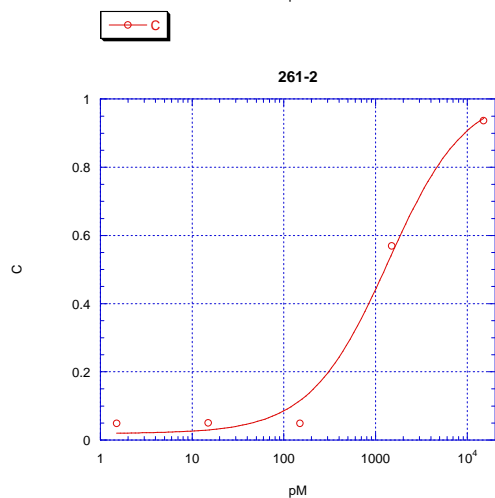

$$y = m1 + m2 * ((100 + m3 + m0) - \sqrt{...})$$

|       | Value     | Error    |
|-------|-----------|----------|
| m1    | 0.019338  | 0.036365 |
| m2    | 1.0058    | 0.08     |
| m3    | 1317.7    | 429.8    |
| Chisq | 0.0063076 | NA       |
| R     | 0.99522   | NA       |

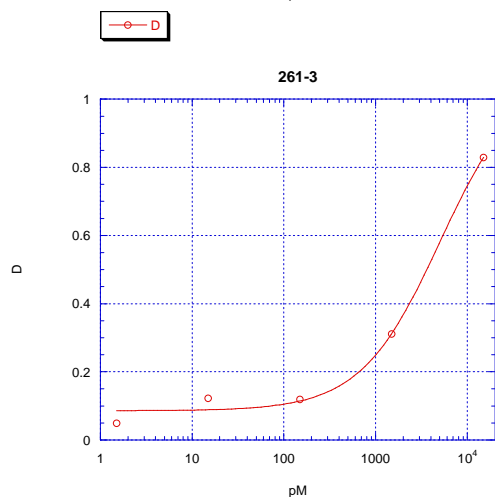

$$y = m1 + m2 * ((100 + m3 + m0) - \sqrt{...})$$

|       | Value     | Error    |
|-------|-----------|----------|
| m1    | 0.086023  | 0.021737 |
| m2    | 0.9901    | 0.10252  |
| m3    | 4972.5    | 1753.9   |
| Chisq | 0.0025004 | NA       |
| R     | 0.99691   | NA       |

Average  $K_d(261) = 2.4 \pm 0.6$  nM

**Figure S1.** Antisense ODN-261 binding curves. Plots fraction iNOS mRNA bound vs free antisense ODN as a function of iNOS mRNA concentration and experimental fits to the equation described in the experimental section.

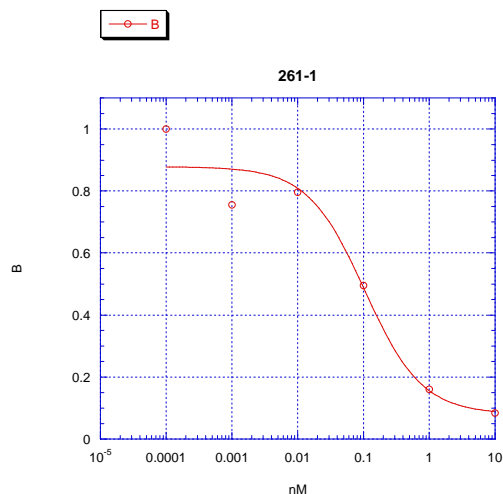

$$y = m1 + (m2 - m1) / (1 + 10^{\log(m0...})$$

|       | Value    | Error    |
|-------|----------|----------|
| m1    | 0.080567 | 0.082029 |
| m2    | 0.8784   | 0.062555 |
| m3    | 0.10483  | 0.061577 |
| Chisq | 0.028544 | NA       |
| R     | 0.9787   | NA       |

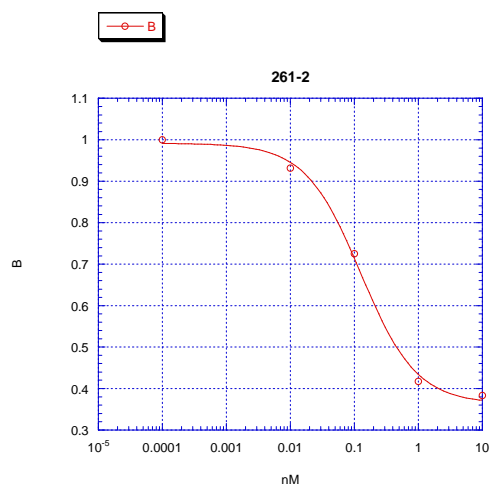

$$y = m1 + (m2 - m1) / (1 + 10^{\log(m0...})$$

|       | Value      | Error    |
|-------|------------|----------|
| m1    | 0.36357    | 0.017591 |
| m2    | 0.99138    | 0.016258 |
| m3    | 0.12693    | 0.020839 |
| Chisq | 0.00082477 | NA       |
| R     | 0.99873    | NA       |

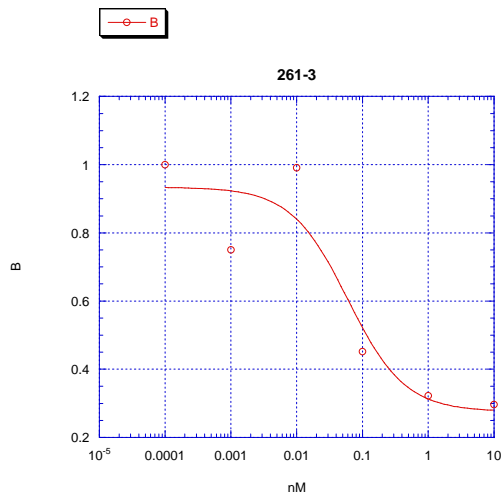

$$y = m1 + (m2 - m1) / (1 + 10^{\log(m0...})$$

|       | Value    | Error    |
|-------|----------|----------|
| m1    | 0.27585  | 0.11411  |
| m2    | 0.93396  | 0.097599 |
| m3    | 0.06001  | 0.064963 |
| Chisq | 0.062652 | NA       |
| R     | 0.93768  | NA       |

Average  $IC_{50}(261) = 97 \pm 30$  pM

**Figure S2.** PNA-261 competition experiment. Plots fraction iNOS mRNA bound vs free antisense ODN as a function of PNA concentration in the competition experiment and experimental fits to the equation described in the experimental section.

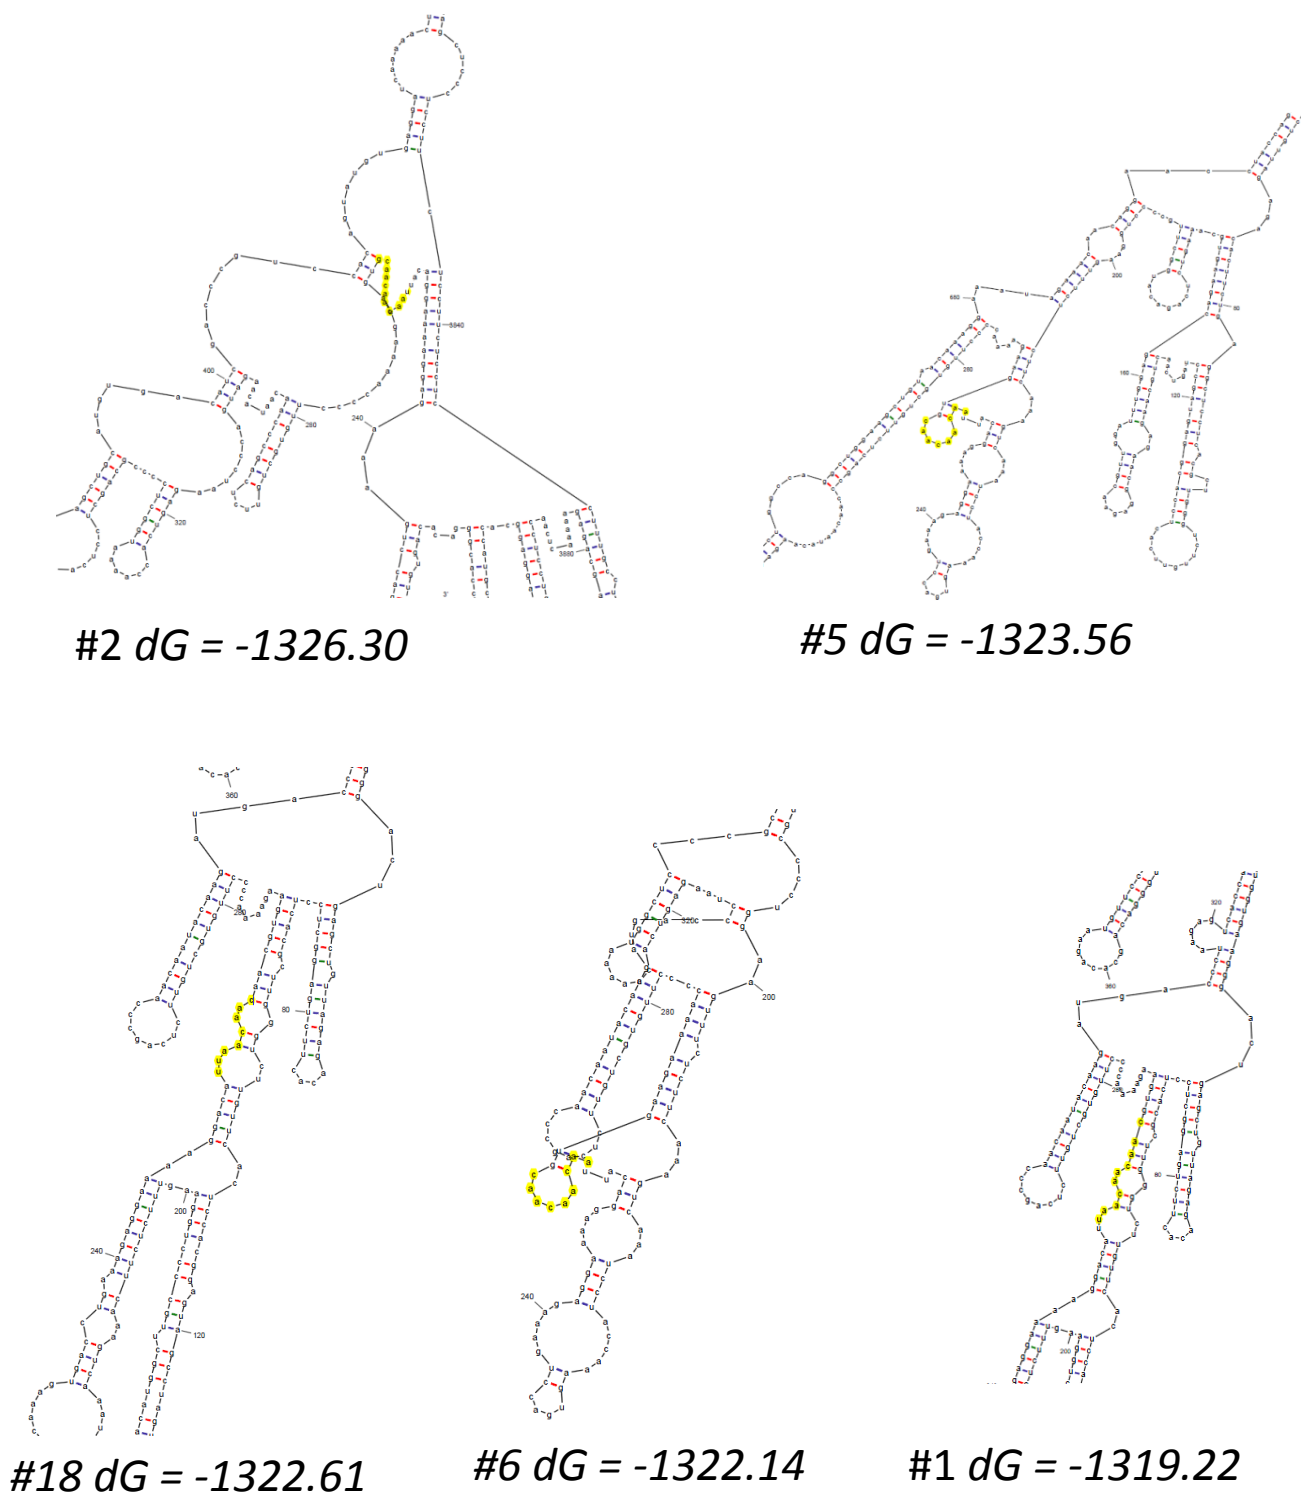

**Figure S3.** The five lowest energy structures predicted for the iNOS mRNA sequence by MFOLD. The target site identified by the RT-ROL method is highlighted in yellow.



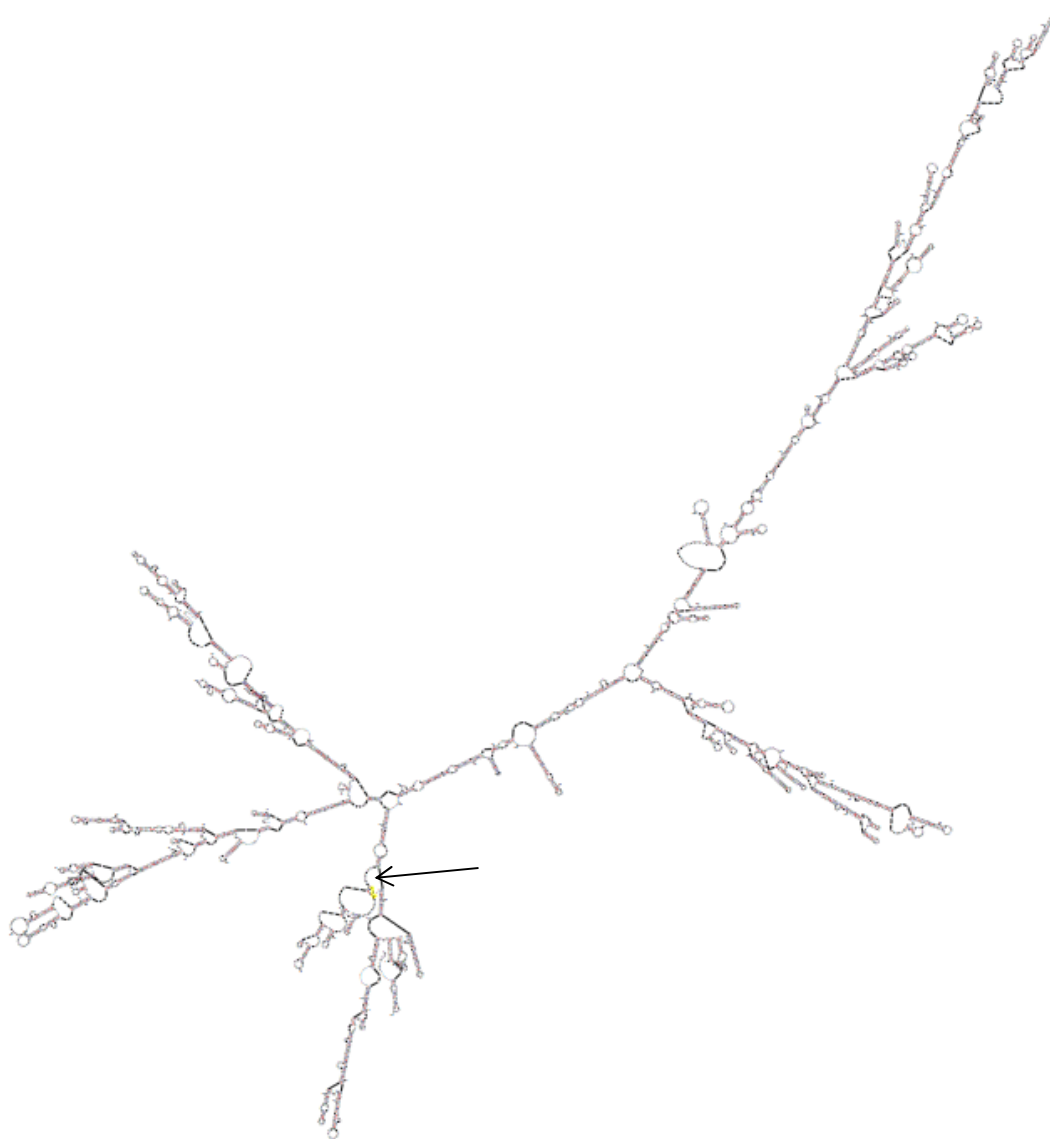

**Figure S4.** Complete folded structure of the lowest energy -1326.30 kcal/mol iNOS mRNA structure. The arrow points to the site experimentally determined to be accessible to an antisense PNA (in yellow in Figure S3). It is highly unlikely that this site would have been selected over any of the other possible accessible sites.

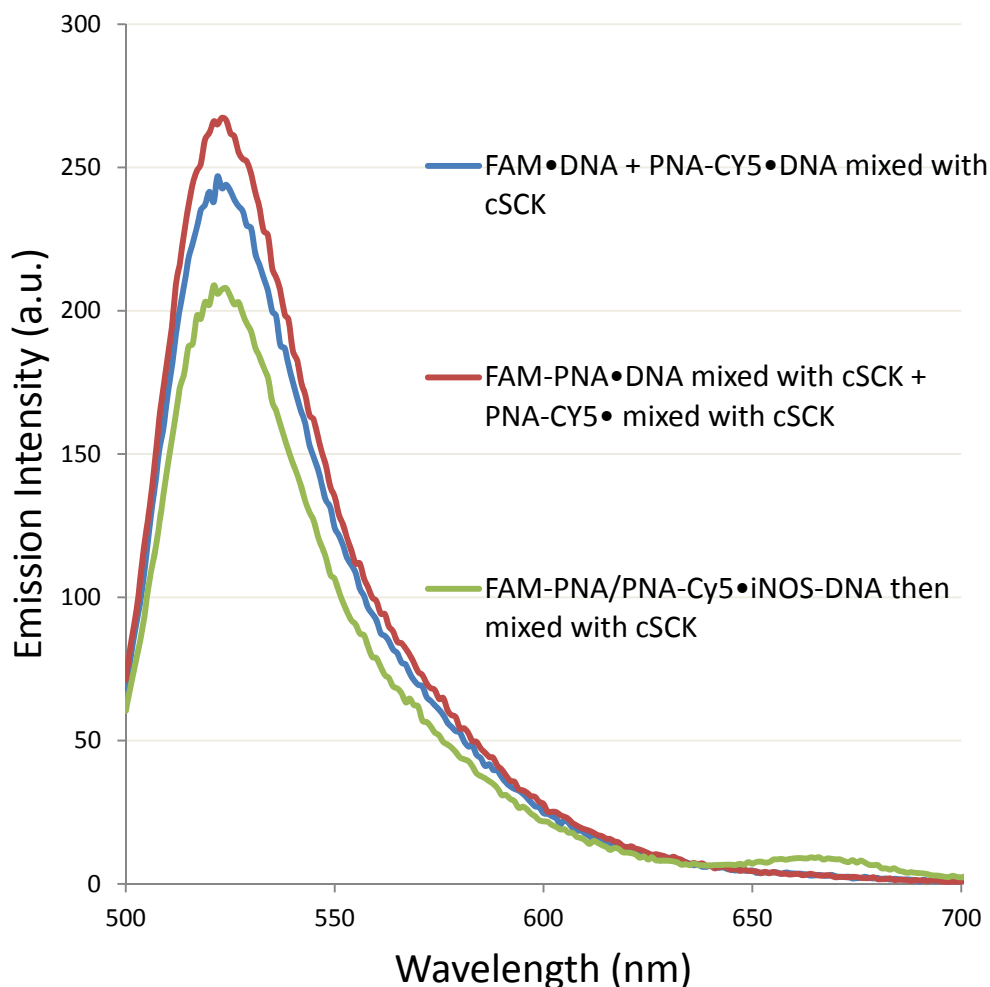

**Figure S5.** Effect of cSCK binding on FRET between PNA-Cy5•DNA and FAM-PNA•DNA. Probe concentration: 0.2  $\mu$ M for PNA•DNA and iNOS-DNA. Solution: Opti-MEM at an N/P ratio of 10. The donor and acceptor probes were at 0.2  $\mu$ M each and preannealed with complementary DNA prior to a) mixing together with cSCK, or b) mixing separately with cSCK and then combining, or c) mixing first with iNOS-DNA and then mixing with the cSCK.
